# Supplementary material for: Polymethylacrylic acid-induced fabrication of hollow hZrO2/g-C3N4 composite photocatalysts: study on solar photocatalytic performance and mechanism insight
Source: Royal Society of Chemistry journal article supplement (doi:10.1039/d3nj04858f), 2023-12-22
Supplement: d3nj04858f1.pdf [file d3nj04858f1.pdf]

Supporting Information of

**Polymethylacrylic acid-induced fabrication of hollow hZrO<sub>2</sub>/g-C<sub>3</sub>N<sub>4</sub> composite photocatalysts : Study on solar photocatalytic performance and mechanism insight**

**Weilong Zhang<sup>1</sup>, Xian Li<sup>1</sup>, Huan Cheng<sup>1</sup>, Jie Yang<sup>2</sup>, Jumei Li<sup>1\*</sup>**

<sup>1</sup>Key Laboratory of Novel Biomass-based Environmental and Energy Materials in Petroleum and Chemical Industry, School of Chemistry and Environmental Engineering, Wuhan Institute of Technology, Wuhan 430205, China

<sup>2</sup>School of Environmental Engineering, Nanjing Institute of Technology, Nanjing 211167, China

\* Corresponding author

E-mail: jumeili2006@163.com

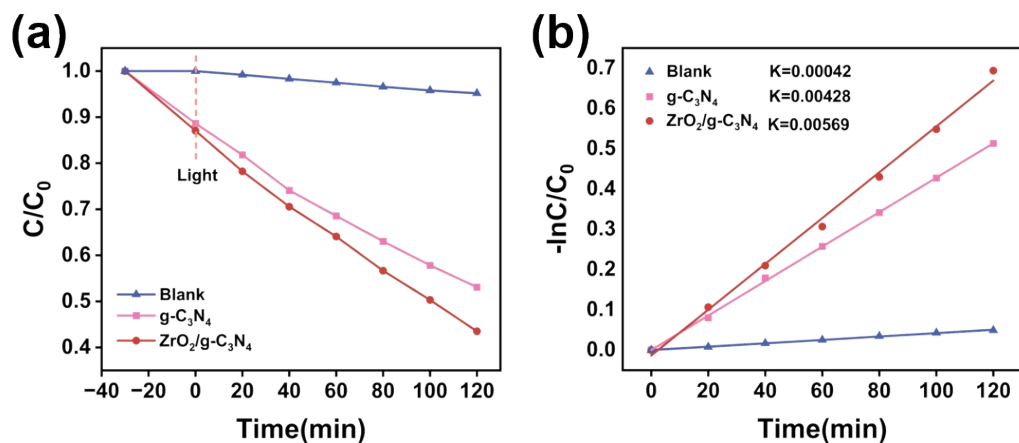

**Fig. S1.** (a) Photocatalytic degradation plots of MB over  $g-C_3N_4$ ,  $ZrO_2/g-C_3N_4$  under full-spectrum illumination, (b) the curves of  $-\ln(C/C_0)$  against the reaction time.

The conduction band (CB) and valence band (VB) positions of g-C<sub>3</sub>N<sub>4</sub> and ZrO<sub>2</sub> could be determined using the following functions[1]:

$$E_{VB} = \chi - E_e + 0.5E_g \quad (1)$$

$$E_{CB} = E_{VB} - E_g \quad (2)$$

where  $E_e$  is the energy of free electrons on the hydrogen scale (4.5 eV vs NHE),  $E_g$  is the band gap,  $E_{CB}$  and  $E_{VB}$  are CB and VB potentials, and  $\chi$  is the absolute electronegativity of the semiconductor. The  $\chi$  values of g-C<sub>3</sub>N<sub>4</sub> and ZrO<sub>2</sub> are 4.73 and 5.91 eV based on the literature[2], respectively.

**Table S1** The  $\chi$ ,  $E_{CB}$ ,  $E_{VB}$  and  $E_g$  for g-C<sub>3</sub>N<sub>4</sub> and ZrO<sub>2</sub>.

| Sample                          | $\chi$ (eV) | $E_{CB}$ (eV) | $E_{VB}$ (eV) | $E_g$ (eV) |
|---------------------------------|-------------|---------------|---------------|------------|
| g-C <sub>3</sub> N <sub>4</sub> | 4.73        | -1.19         | 1.71          | 2.9        |
| ZrO <sub>2</sub>                | 5.91        | -0.91         | 3.79          | 4.7        |

## References

- [1] S. Ghattavi, A. Nezamzadeh-Ejehi, A visible light driven AgBr/g-C<sub>3</sub>N<sub>4</sub> photocatalyst composite in methyl orange photodegradation: focus on photoluminescence, mole ratio, synthesis method of g-C<sub>3</sub>N<sub>4</sub> and scavengers, *Compos. B. Eng.* 183 (2020) 107712.
- [2] K. Zhang, M. Zhou, C. Yu, K. Yang, X.X. Li, W.X. Dai, J. Guan, Q. Shu, W.Y. Huang, Construction of S-scheme g-C<sub>3</sub>N<sub>4</sub>/ZrO<sub>2</sub> heterostructures for enhancing photocatalytic disposals of pollutants and electrocatalytic hydrogen evolution, *Dyes Pigm.* 180 (2020) 108525.
